# Supplementary material for: Synthesis and characterization of macroporous europium-doped Ca12Al14O33 (C12A7:Eu3+) and its application in metal ion detection
Source: Royal Society of Chemistry journal article supplement (doi:10.1039/c9nj01265f), 2019-01-01
Supplement: c9nj01265f1.pdf [file c9nj01265f1.pdf]

## Supporting Information

### SI 1 the relationship between the optical properties of $\text{Eu}^{3+}$ ions and the structure of host

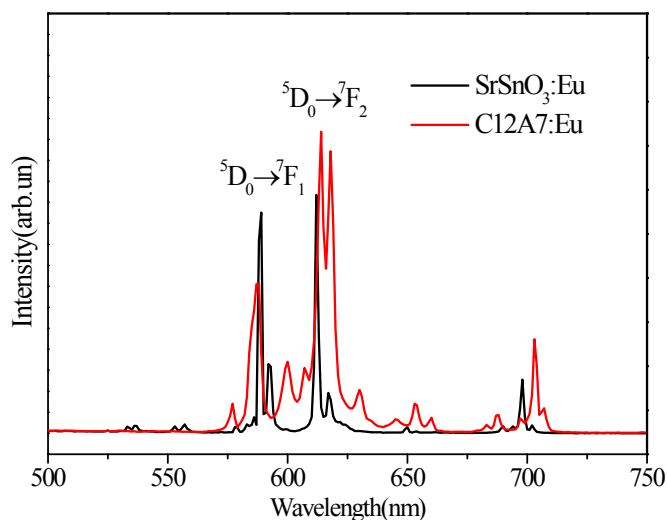

**Figure S1.** Emission spectrum of  $\text{C12A7}:\text{Eu}$  and  $\text{SrSnO}_3:\text{Eu}$

### SI 2 the relationship between the luminescence properties $\text{Eu}^{3+}$ ions and the pore structure

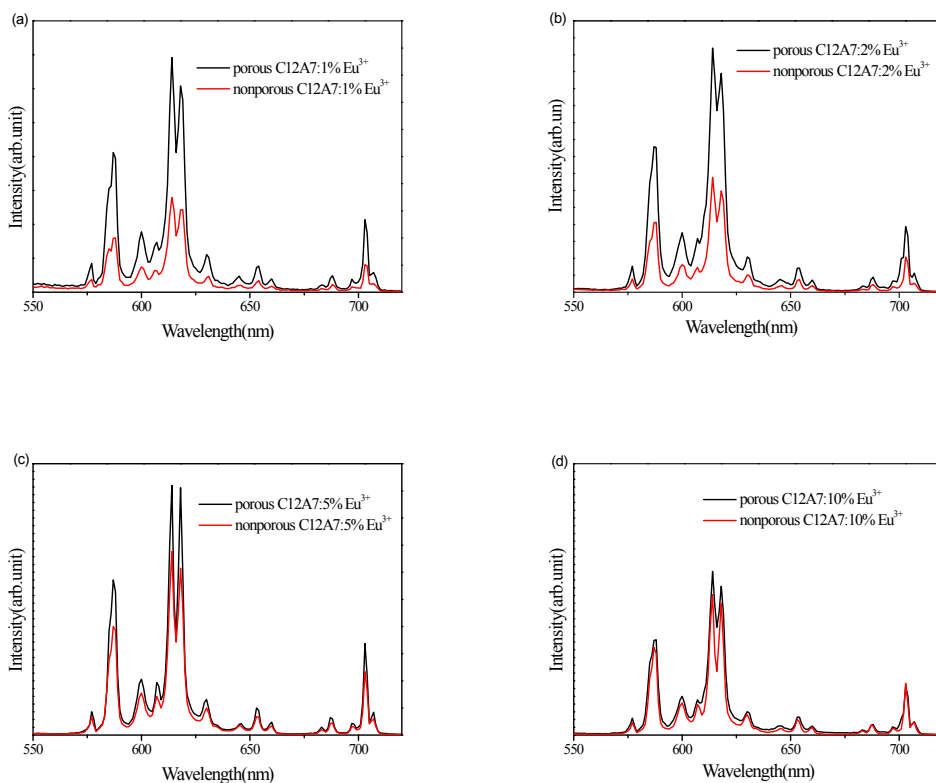

**Figure S2.** Room temperature emission spectra at 391 nm of C12A7 doped with different  $\text{Eu}^{3+}$  contents with and without pore structure: (a) 1%; (b) 2%; (c) 5%; (d) 10%.
